# Supplementary material for: Genetic Testing to Predict Weight Loss and Diabetes Remission and Long-Term Sustainability after Bariatric Surgery: A Pilot Study
Source: PubMed Central journal article supplement (PMC6679039; doi:10.3390/jcm8070964), 2019-07-03
Supplement: jcm-08-00964-s001.pdf [file jcm-08-00964-s001.pdf]

## Supplementary Materials

### GPSs evaluated in the study and the risk score calculation.

GPS: genetic prediction risk score. SNP: single nucleotide polymorphism. GPSs are calculated by using an additive model based on the total number of risk alleles in each genotype of the assessed SNP.

#### GPS diabetes

| SNP        | GENE   | Minor Allele | Major allele | Risk allele | Protective allele | Risk homozygote | Risk heterozygote |
|------------|--------|--------------|--------------|-------------|-------------------|-----------------|-------------------|
| rs4343     | ACE    | G            | A            | G           | n.a.              | 2               | 1                 |
| rs16861209 | ADIPOQ | A            | C            | A           | n.a.              | 2               | 1                 |
| rs5186     | AGTR1  | C            | A            | C           | n.a.              | 2               | 1                 |
| CD010      | APOC3  | A            | G            | A           | n.a.              | 2               | 1                 |
| rs7754840  | CDKAL1 | C            | G            | C           | n.a.              | 2               | 1                 |
| rs10811661 | CDKN2B | C            | T            | C           | n.a.              | 2               | 1                 |
| rs696217   | GHRL   | T            | G            | T           | n.a.              | 2               | 1                 |
| rs1800795  | IL6    | C            | G            | n.a.        | C                 | -2              | -1                |
| rs12970134 | MC4R   | A            | G            | A           | n.a.              | 2               | 1                 |
| rs1800206  | PPARA  | G            | C            | G           | n.a.              | 2               | 1                 |
| rs1801282  | PPARG  | G            | C            | C           | n.a.              | 2               | 1                 |
| rs7903146  | TCF7L2 | T            | C            | T           | n.a.              | 2               | 1                 |
| rs10010131 | WFS1   | A            | G            | n.a.        | A                 | -2              | -1                |
| CD014      | PON1   | T            | A            | A           | n.a.              | 1               | 0                 |

#### GPS Appetite regulation

| SNP        | GENE   | Minor Allele | Major allele | Risk allele | Protective allele | Risk homozygote | Risk heterozygote |
|------------|--------|--------------|--------------|-------------|-------------------|-----------------|-------------------|
| rs6265     | BDNF   | A            | G            | G           | n.a.              | 2               | 1                 |
| rs925946   | BDNFOS | T            | G            | T           | n.a.              | 2               | 1                 |
| rs12535708 | LEP    | A            | C            | C           | n.a.              | 2               | 1                 |
| rs52820871 | MC4R   | G            | T            | n.a.        | G                 | -2              | -1                |
| rs17700633 | MC4R   | A            | G            | A           | n.a.              | 2               | 1                 |
| rs2229616  | MC4R   | A            | G            | n.a.        | A                 | -2              | -1                |

|            |       |   |   |   |      |   |   |
|------------|-------|---|---|---|------|---|---|
| rs10838738 | MTCH2 | G | A | G | n.a. | 2 | 1 |
| rs4580704  | CLOCK | G | C | C | n.a. | 1 | 0 |
| rs4864548  | CLOCK | A | G | A | n.a. | 2 | 1 |
| rs17782313 | MC4R  | C | T | C | n.a. | 2 | 1 |

### GPS- Weight loss in response to exercise

| SNP       | GENE  | Minor Allele | Major allele | Risk allele | Protective allele | Risk homozygote | Risk heterozygote |
|-----------|-------|--------------|--------------|-------------|-------------------|-----------------|-------------------|
| rs328     | LPL   | G            | C            | n.a.        | G                 | 2               | 1                 |
| rs696217  | GHRL  | T            | G            | n.a.        | T                 | 2               | 1                 |
| rs4994    | ADRB3 | C            | T            | n.a.        | C                 | 2               | 1                 |
| rs1800795 | IL6   | C            | G            | n.a.        | C                 | 2               | 1                 |
| rs9693898 | Chr.8 | G            | A            | G           | n.a.              | 2               | 1                 |

### GPS weight loss in response to diet

| SNP       | GENE  | Minor Allele | Major allele | Risk allele | Protective allele | Risk homozygote | Risk heterozygote |
|-----------|-------|--------------|--------------|-------------|-------------------|-----------------|-------------------|
| rs2419621 | ACSL5 | T            | C            | n.a.        | T                 | 2               | 2                 |
| rs5082    | APOA2 | T            | C            | n.a.        | C                 | 2               | 0                 |
| rs651821  | APOA5 | C            | T            | n.a.        | C                 | 2               | 1                 |
| rs894160  | PLIN1 | A            | G            | n.a.        | A                 | 2               | 1                 |
| rs1137100 | LEPR  | G            | A            | n.a.        | A                 | 2               | 0                 |
| rs1800849 | UCP3  | T            | C            | n.a.        | C                 | 2               | 0                 |
| rs659366  | UCP2  | T            | C            | n.a.        | T                 | 2               | 1                 |
| rs1801282 | PPARG | G            | C            | G           | n.a.              | -2              | -2                |
| rs6824447 | Chr.4 | G            | A            | G           | n.a.              | 2               | 1                 |
| rs1052700 | PLIN  | A            | T            | n.a.        | A                 | 2               | 0                 |

**GPS-life style interventions (Moleres)**

| <b>SNP</b> | <b>GENE</b> | <b>Minor Allele</b> | <b>Major allele</b> | <b>Risk allele</b> | <b>Protective allele</b> | <b>Risk homozygote</b> | <b>Risk heterozygote</b> |
|------------|-------------|---------------------|---------------------|--------------------|--------------------------|------------------------|--------------------------|
| rs9939609  | FTO         | A                   | T                   | A                  | n.a.                     | 2                      | 1                        |
| rs17782313 | MC4R        | C                   | T                   | C                  | n.a.                     | 2                      | 1                        |
| rs1800795  | IL-6        | C                   | G                   | C                  | n.a.                     | 2                      | 1                        |
| rs1801282  | PPARG       | G                   | C                   | G                  | n.a.                     | 2                      | 1                        |
| rs2241766  | ADIPOQ      | G                   | T                   | T                  | n.a.                     | 2                      | 1                        |

**GPS-bariatric surgery (Still)**

| <b>SNP</b> | <b>GENE</b> | <b>Minor Allele</b> | <b>Major allele</b> | <b>Risk allele</b> | <b>Protective allele</b> | <b>Risk homozygote</b> | <b>Risk heterozygote</b> |
|------------|-------------|---------------------|---------------------|--------------------|--------------------------|------------------------|--------------------------|
| rs7566605  | INSIG2      | C                   | G                   | C                  | n.a.                     | 2                      | 1                        |
| rs9939609  | FTO         | A                   | T                   | A                  | n.a.                     | 2                      | 1                        |
| rs17782313 | MC4R        | C                   | T                   | C                  | n.a.                     | 2                      | 1                        |
| rs6235     | PCSK1       | C                   | G                   | C                  | n.a.                     | 2                      | 1                        |
